# Supplementary material for: Combining Metabolomics and Transcriptomics to Reveal the Mechanism of Coloration in Purple and Cream Mutant of Sweet Potato (Ipomoea batatas L.)
Source: Front Plant Sci. 2022 May 4;13:877695. doi: 10.3389/fpls.2022.877695 (PMC9116297; doi:10.3389/fpls.2022.877695)
Supplement: Supplementary file 3 [file Table_3.XLSX]

## Sheet: Sheet1
Index	Ion mode	Q1 (Da)	Q3 (Da)	Rt (min)	Molecular Weight (Da)	Ionization model	KEGG ID	Compounds	Class	Xuzi201_1	Xuzi201_2	Xuzi201_3	M1001_1	M1001_2	M1001_3
DeB33	Positive	106	59.9	0.75	105.043	[M+H]+	C00065	L-Serine	Amino acids	425000	348000	423000	441000	544000	529000
DeB42	Positive	90.048	71.8	0.76	89.048	[M+H]+	C00041	L-Alanine	Amino acids	623000	610000	574000	763000	710000	760000
DeB60	Positive	190.1	84	0.78	189.111	[M+H]+	C02427	L-Homocitrulline	Amino acids	41300	53800	27400	37000	42600	50100
DeB61	Positive	122.02	80.1	0.78	121.02	[M+H]+	C00097	L-Cysteine	Amino acids	9	9	9	9	9	1560
DeB65	Positive	116.1	70	0.79	115.063	[M+H]+	C00148	L-Proline	Amino acids	1720000	1140000	1230000	1290000	1950000	1490000
DeB74	Positive	162.1	98.3	0.81	161.1	[M+H]+	C00956	2-Aminoadipic acid (L-Homoglutamic acid)	Amino acids	844000	428000	436000	177000	422000	323000
DeB78	Positive	118.1	71.8	0.81	117.079	[M+H]+	C00183	L-Valine	Amino acids	6750000	5360000	4750000	8070000	12300000	10500000
DeB82	Positive	269	134	0.81	268.055	[M+H]+	C01817	L-Homocystine	Amino acids	5650	4760	4930	9440	10900	8180
DeB88	Positive	118	88	0.85	117.079	[M+H]+	C01826	Dl-Norvaline	Amino acids	5150000	3680000	3220000	5880000	9510000	7820000
DeB119	Positive	182.1	136.1	1.21	181.074	[M+H]+	C00082	L-(-)-Tyrosine	Amino acids	3320000	2710000	2390000	3200000	4110000	4380000
DeB131	Positive	132	85.9	1.23	131.095	[M+H]+	C00407	L-Isoleucine	Amino acids	10200000	7230000	6330000	9790000	15100000	12600000
DeB136	Positive	138.084	103	1.25	137.084	[M+H]+	C00483	L-Tyramine	Amino acids	509000	420000	352000	247000	409000	342000
DeB233	Positive	205.1	146.1	2.36	204.09	[M+H]+	C00078	L-Tryptophan	Amino acids	5180000	7460000	5950000	19500000	16000000	19800000
DeB781	Negative	154.1	92.9	0.67	155.07	[M-H]-	C00135	L-Histidine	Amino acids	109000	103000	111000	235000	205000	235000
DeB784	Negative	173.1	131.1	0.69	174.112	[M-H]-	C00062	L-(+)-Arginine	Amino acids	39000	48400	37800	83800	70600	77600
DeB793	Negative	118	100.9	0.75	119.058	[M-H]-	C00188	L-Threonine	Amino acids	200000	204000	185000	367000	262000	344000
DeB796	Negative	118.1	101	0.75	119.058	[M-H]-	C00263	L-Homoserine	Amino acids	37700	27800	25200	43500	46900	43500
DeB797	Negative	131.054	71.8	0.75	132.054	[M-H]-	C00152	L-Asparagine	Amino acids	1990000	2250000	2280000	4760000	4170000	4430000
DeB798	Negative	145.069	127.1	0.75	146.069	[M-H]-	C00064	L-Glutamine	Amino acids	339000	371000	404000	630000	516000	531000
DeB801	Negative	174.1	131.1	0.76	175.096	[M-H]-	C00327	L-Citrulline	Amino acids	23200	17600	20900	45300	33500	44100
DeB812	Negative	132	99.9	0.77	133.037	[M-H]-	C00049	L-Aspartic acid	Amino acids	7820000	6540000	7700000	4520000	4010000	4490000
DeB813	Negative	146.1	102.1	0.77	147.053	[M-H]-	C00025	L-Glutamic acid	Amino acids	5810000	5160000	5640000	4110000	3380000	3450000
DeB925	Negative	130.1	130.1	1.27	131.095	[M-H]-	C00123	L-Leucine	Amino acids	23500	35100	30500	43200	44700	53300
DeB977	Negative	164.1	147.1	1.96	165.079	[M-H]-	C00079	L-Phenylalanine	Amino acids	943000	949000	970000	5240000	4120000	4580000
DeB19	Positive	170.1	124.1	0.68	169.085	[M+H]+	C01152	1-Methylhistidine	Amino acid derivatives	107000	153000	111000	103000	170000	131000
DeB21	Positive	189	144.2	0.68	188.127	[M+H]+	C01924	H-HomoArg-OH	Amino acid derivatives	28100	15300	19300	46100	59000	63600
DeB44	Positive	104	85.9	0.76	103.063	[M+H]+	C03665	2-Aminoisobutyric acid	Amino acid derivatives	1520000	1570000	1450000	1460000	1350000	1250000
DeB63	Positive	104	58	0.78	103.063	[M+H]+	C01026	N,N-Dimethylglycine	Amino acid derivatives	181000	179000	173000	310000	348000	299000
DeB66	Positive	173.2	116.1	0.79	172.085	[M+H]+	-	Glycyl-L-proline	Amino acid derivatives	9020	4250	2020	5040	3800	4000
DeB68	Positive	166	149.1	0.79	165.046	[M+H]+	-	Methionine sulfoxide	Amino acid derivatives	565000	307000	355000	333000	694000	575000
DeB77	Positive	235.1	118.4	0.81	234.1	[M+H]+	-	Lysine butyrate	Amino acid derivatives	25600000	22400000	24200000	13200000	14900000	16100000
DeB94	Positive	219	156.1	1.11	218.09	[M+H]+	C03740	(5-L-Glutamyl)-L-amino acid	Amino acid derivatives	22100	25600	28200	25900	17700	35000
DeB95	Positive	217.1	158.1	1.16	216.122	[M+H]+	-	Nα-Acetyl-L-arginine	Amino acid derivatives	9790	9	9	8340	7710	9
DeB104	Positive	308	162	1.18	307.084	[M+H]+	C00051	Glutathione reduced form	Amino acid derivatives	4790	6300	8740	49600	276000	122000
DeB113	Positive	176	88	1.2	175.048	[M+H]+	C01042	N-Acetylaspartate	Amino acid derivatives	46700	34900	38500	29100	40800	51200
DeB114	Positive	118	76	1.2	117.043	[M+H]+	-	N-acetylglycine	Amino acid derivatives	18700000	14200000	12500000	8730000	15200000	12300000
DeB122	Positive	189.2	84	1.21	188.116	[M+H]+	C02727	N6-Acetyl-L-lysine	Amino acid derivatives	101000	79100	54200	110000	119000	127000
DeB123	Positive	189.2	130	1.21	188.08	[M+H]+	-	Nα-Acetyl-L-glutamine	Amino acid derivatives	150000	116000	101000	197000	181000	205000
DeB132	Positive	190.1	130.1	1.23	189.064	[M+H]+	C00624	N-Acetyl-L-glutamic acid	Amino acid derivatives	70900	46900	71900	124000	126000	129000
DeB134	Positive	322.4	176.1	1.24	321.1	[M+H]+	C11347	S-(methyl)glutathione	Amino acid derivatives	53900	49400	62700	64900	81600	68500
DeB135	Positive	130	83.9	1.24	129.043	[M+H]+	C01879	5-oxoproline	Amino acid derivatives	576000	414000	324000	553000	996000	848000
DeB183	Positive	164	61	1.77	163	[M+H]+	-	L-Methionine methyl ester	Amino acid derivatives	30900	24500	16100	22700	44700	41700
DeB190	Positive	189.1	86	1.91	188.116	[M+H]+	C02155	N-Glycyl-L-leucine	Amino acid derivatives	10100	10500	5720	6320	13700	9230
DeB197	Positive	209.1	146.1	1.96	208.085	[M+H]+	C00328	L-Kynurenine	Amino acid derivatives	323000	414000	367000	635000	537000	637000
DeB203	Positive	237.1	146.1	2.01	236.08	[M+H]+	C02700	N'-Formylkynurenine	Amino acid derivatives	4370	9	9	4720	5990	9
DeB373	Positive	313.4	120	3.34	312.147	[M+H]+	-	Phe-Phe	Amino acid derivatives	3390	9	2670	5930	5450	7790
DeB786	Negative	189.095	128.1	0.73	190.095	[M-H]-	C00666	2,6-Diaminooimelic acid	Amino acid derivatives	359000	412000	464000	411000	263000	329000
DeB831	Negative	307	145.2	0.79	308	[M-H]-	-	L-Glutamine O-hexside	Amino acid derivatives	9	8890	8030	18400	11900	16600
DeB836	Negative	308.1	128.2	0.8	309.1	[M-H]-	-	L-Glutamic acid O-glucoside	Amino acid derivatives	23400	20300	21200	24200	17500	18600
DeB852	Negative	144.1	126.1	0.83	145.074	[M-H]-	C04076	Allysine(6-Oxo DL-Norleucine)	Amino acid derivatives	48400	45800	54400	44800	43700	52500
DeB868	Negative	128	126	1.15	129.079	[M-H]-	C00408	L-Pipecolic acid	Amino acid derivatives	8320	7330	7390	24800	23300	25900
DeB881	Negative	611.1	306.2	1.19	612.1	[M-H]-	C00127	Glutathione oxidized	Amino acid derivatives	62300	65200	60100	120000	124000	147000
DeB897	Negative	160	73.9	1.21	161.069	[M-H]-	-	N-Acetylthreonine	Amino acid derivatives	43200	40900	38100	54900	41300	59700
DeB926	Negative	130.1	73.8	1.29	131.058	[M-H]-	-	N-Propionylglycine	Amino acid derivatives	21000	10400	15900	14700	13800	12000
DeB927	Negative	383	134	1.31	384.122	[M-H]-	C00021	S-(5'-Adenosy)-L-homocysteine	Amino acid derivatives	95400	96300	90500	57300	56900	75500
DeB951	Negative	219.1	144.1	1.63	220.085	[M-H]-	C00643	5-Hydroxy-L-tryptophan	Amino acid derivatives	4370	9	3740	21000	21900	19400
DeB1016	Negative	279.3	147.1	2.4	280.106	[M-H]-	-	Asp-phe	Amino acid derivatives	20100	18600	16600	25500	15600	23200
DeB1024	Negative	190.1	84	2.46	191.1	[M-H]-	C02712	N-Acetylmethionine	Amino acid derivatives	10100	9	9	13800	9	8400
DeB1025	Negative	145.1	101	2.46	146.058	[M-H]-	-	2,3-dimethylsuccinic acid	Amino acid derivatives	379000	380000	422000	550000	452000	501000
DeB1112	Negative	172.105	130	3.49	173.105	[M-H]-	C02710	N-Acetyl-l-leucine	Amino acid derivatives	36300	33600	38400	39000	32700	37600
DeB1151	Negative	245	203.2	3.81	246	[M-H]-	C03137	Acetyl tryptophan	Amino acid derivatives	5800	3780	7600	9	9	6660
DeB337	Positive	137.3	94.3	3.09	136.3	[M+H]+	C00568	p-Aminobenzoate	Benzoic acid derivatives	33400	9	36600	52200	96200	81800
DeB551	Positive	457.2	191.5	4.44	456.2	[M+H]+	-	8-Methyl-2-oxo-4-phenyl-2H-chromen-7-yl 4-(hexyloxy)benzoate	Benzoic acid derivatives	49700	26300	44900	16300	36600	26300
DeB825	Negative	460.1	118.2	0.78	461.1	[M-H]-	-	Anthranilate O-hexosyl-O-hexoside	Benzoic acid derivatives	414000	675000	371000	537000	544000	644000
DeB975	Negative	315.1	152.1	1.93	316.1	[M-H]-	-	2,5-dihydroxy benzoic acid O-hexside	Benzoic acid derivatives	1780000	1920000	1860000	436000	338000	376000
DeB989	Negative	331	313.7	2.14	332	[M-H]-	-	Gallic acid O-Hexoside	Benzoic acid derivatives	99600	101000	101000	137000	117000	120000
DeB1007	Negative	359.1	197.1	2.31	360.1	[M-H]-	-	Syringic acid O-glucoside	Benzoic acid derivatives	185000	191000	198000	286000	255000	255000
DeB1052	Negative	153	108.1	2.79	154.027	[M-H]-	C00628	2,5-dihydroxybenzoic acid (Gentisic acid)	Benzoic acid derivatives	39100	28800	31800	25200	23000	31700
DeB1119	Negative	121.04	91.9	3.58	122.037	[M-H]-	C00633	4-Hydroxybenzaldehyde	Benzoic acid derivatives	101000	75800	89100	178000	157000	202000
DeB1158	Negative	151.047	136.1	3.85	152.047	[M-H]-	C00755	Vanillin	Benzoic acid derivatives	220000	275000	265000	157000	112000	110000
DeB1215	Negative	121.037	77	4.37	122.037	[M-H]-	C00180	Benzoic acid	Benzoic acid derivatives	214000	900000	64800	223000	147000	167000
DeB166	Positive	153.06	136.1	1.5	152.059	[M+H]+	-	1,4-dihydro-1-Methyl-4-oxo-3-pyridinecarboxamide	Pyridine derivatives	31600	21000	20500	16100	43900	31100
DeB177	Positive	184.05	148.1	1.66	183.053	[M+H]+	C00847	4-Pyridoxic acid	Pyridine derivatives	11400	11300	8360	12300	14700	16800
DeB816	Negative	181	70.9	0.77	182.079	[M-H]-	C00794	D-Sorbitol	Alcohols and polyols	11700	11800	17300	17400	9700	11400
DeB846	Negative	204.13	71.7	0.82	205.131	[M-H]-	C05944	Pantothenol	Alcohols and polyols	9	9	2340	9	9	9
DeB850	Negative	163.2	162.9	0.83	164.069	[M-H]-	C07326	1,5-Anhydro-D-glucitol	Alcohols and polyols	30500	22500	27900	50800	41100	42000
DeB46	Positive	184	83.2	0.77	183	[M+H]+	C00588	O-Phosphocholine	Cholines	1820000	1150000	1180000	930000	1460000	1340000
DeB52	Positive	147.12	88	0.77	146.118	[M+H]+	C08201	Acetylcholine	Cholines	208000	97100	102000	53600	85700	61900
DeB59	Positive	104.1	60.2	0.78	103.1	[M+H]+	C00114	Choline	Cholines	15000000	15800000	14500000	14100000	13700000	13200000
DeB70	Positive	258.2	125.2	0.8	258.2	Protonated	C00670	sn-Glycero-3-phosphocholine	Cholines	534000	426000	483000	361000	453000	521000
DeB232	Positive	307	248.1	2.36	306.074	[M+H]+	C12127	(+)-Gallocatechin (GC)	Catechin derivatives	47200	50300	40700	9	4020	4030
DeB277	Positive	307	139.1	2.64	306	[M+H]+	C12136	Epigallocatechin (EGC)	Catechin derivatives	9	9	9	9	2850	6500
DeB346	Positive	291	139.1	3.17	290.3	[M+H]+	C09727	L-Epicatechin	Catechin derivatives	15700	9	9960	309000	490000	415000
DeB1033	Negative	315.1	153.2	2.55	316.1	[M-H]-	-	Protocatechuic acid O-glucoside	Catechin derivatives	44900	52200	44500	106000	87200	88300
DeB1034	Negative	153.1	109.1	2.55	154.027	[M-H]-	C00230	Protocatechuic acid	Catechin derivatives	158000	163000	154000	130000	91100	114000
DeB1054	Negative	289.079	125	2.81	290.079	[M-H]-	C06562	Catechin	Catechin derivatives	9	9	9	143000	146000	133000
DeB1071	Negative	137.1	137	2.99	138.032	[M-H]-	C16700	Protocatechuic aldehyde	Catechin derivatives	65200	36300	58400	12400	10700	7450
DeB1085	Negative	457.2	169.1	3.18	458.085	[M-H]-	C09731	Epigallate catechin gallate (EGCG)	Catechin derivatives	68800	25200	56300	68200	61600	47700
DeB1141	Negative	441.3	289.1	3.73	442.3	[M-H]-	-	Epicatechin gallate (ECG)	Catechin derivatives	11300	8410	9560	17700	12800	14400
DeB1	Positive	203	112	0.54	202	[M+H]+	C00750	Spermine	Phenolamides	8160000	6670000	6550000	7150000	7000000	8950000
DeB7	Positive	89	71.9	0.6	88.1	[M+H]+	C00134	Putrescine	Phenolamides	85400	108000	78200	164000	223000	233000
DeB11	Positive	131.1	72.1	0.64	130.1	[M+H]+	C00179	Agmatine	Phenolamides	10700	8970	6070	8720	15300	11700
DeB228	Positive	235.1	147.4	2.32	234.1	[M+H]+	-	N'-p-Coumaroyl putrescine	Phenolamides	290000	331000	330000	118000	139000	157000
DeB253	Positive	265.1	177.5	2.47	264.1	[M+H]+	C10497	N-Feruloyl putrescine	Phenolamides	1760	2090	802	3880	5350	5810
DeB585	Positive	314	177.5	4.76	313	[M+H]+	C02717	N-Feruloyl tyramine	Phenolamides	43300	53100	56000	22800	13000	18300
DeB27	Positive	74	56.9	0.71	73.0971	[M+H]+	-	1-methylguanidine	Nucleotide and its derivates	20100	16700	13800	21500	30700	27900
DeB28	Positive	333.052	137	0.72	332.052	[M+H]+	C06196	2'-Deoxyinosine-5'-monophosphate	Nucleotide and its derivates	4050000	4750000	4120000	4010000	3920000	3500000
DeB29	Positive	112	95	0.73	111.043	[M+H]+	C00380	Cytosine	Nucleotide and its derivates	51700	52100	52400	54000	47700	42400
DeB67	Positive	335.1	122.8	0.79	334.057	[M+H]+	C00455	β-Nicotinamide mononucleotide	Nucleotide and its derivates	354000	184000	400000	398000	338000	348000
DeB71	Positive	269.1	137	0.8	268.081	[M+H]+	C00294	Inosine	Nucleotide and its derivates	143000	122000	93500	66900	84300	96700
DeB83	Positive	366.2	203.5	0.82	365.2	[M+H]+	-	iP7G	Nucleotide and its derivates	329000	233000	234000	570000	626000	493000
DeB96	Positive	298.1	166.5	1.17	297.1	[M+H]+	-	N2-methylguanosine	Nucleotide and its derivates	7100	10700	6150	6860	5840	2030
DeB97	Positive	153	136.4	1.17	152	[M+H]+	C00385	Xanthine	Nucleotide and its derivates	12800	13400	11400	6430	5540	5490
DeB98	Positive	664.2	524.1	1.17	663.2	[M+H]+	C00003	Nicotinic acid adenine dinucleotide	Nucleotide and its derivates	1130000	1110000	1030000	1100000	1280000	1140000
DeB99	Positive	349.1	137.4	1.17	348.1	[M+H]+	C00130	Inosine 5'-monophosphate	Nucleotide and its derivates	49900	50200	65800	43800	66600	30400
DeB101	Positive	228	112	1.17	227.091	[M+H]+	C00881	Deoxycytidine	Nucleotide and its derivates	36400	32400	41000	40600	49100	41500
DeB103	Positive	348.2	136.4	1.18	347.2	[M+H]+	C00020	Adenosine 5'-monophosphate	Nucleotide and its derivates	1480000	1320000	1430000	1130000	1310000	1680000
DeB107	Positive	113.027	95.9	1.19	112.027	[M+H]+	C00106	Uracil	Nucleotide and its derivates	80800	75300	64600	55600	73800	55000
DeB111	Positive	137	110	1.2	136.038	[M+H]+	C00262	Hypoxanthine	Nucleotide and its derivates	13000	7180	6190	5760	12300	8160
DeB133	Positive	325	97	1.23	324.036	[M+H]+	C00105	Uridine 5'-monophosphate	Nucleotide and its derivates	122000	88300	122000	104000	93600	92300
DeB143	Positive	332	136.1	1.27	331.068	[M+H]+	C00360	2'-Deoxyadenosine-5'-monophosphate	Nucleotide and its derivates	387000	572000	593000	553000	435000	398000
DeB180	Positive	268.097	151.7	1.73	267.097	[M+H]+	C00330	Deoxyguanosine	Nucleotide and its derivates	61400	49600	51000	44800	61000	57600
DeB181	Positive	285.1	153.1	1.74	284.076	[M+H]+	C01762	Xanthosine	Nucleotide and its derivates	171000	136000	130000	27700	48400	45800
DeB184	Positive	259.085	126.7	1.8	258.085	[M+H]+	-	5-Methyluridine	Nucleotide and its derivates	10500	8750	8660	4670	7560	7490
DeB195	Positive	167.1	121	1.95	166.1	[M+H]+	C16614	6-Methylmercaptopurine	Nucleotide and its derivates	1480000	1040000	809000	3900000	7110000	5960000
DeB198	Positive	252	136.1	1.96	251.102	[M+H]+	C00559	Deoxyadenosine	Nucleotide and its derivates	97500	92500	93500	57800	63000	70800
DeB290	Positive	298	135.1	2.73	297.09	[M+H]+	C00170	5'-Deoxy-5'-(methylthio)adenosine	Nucleotide and its derivates	1100000	1950000	1120000	326000	383000	371000
DeB830	Negative	403	159	0.78	404.161	[M-H]-	C00015	Uridine 5’-diphosphate	Nucleotide and its derivates	61200	62900	56700	57200	52100	59700
DeB845	Negative	322	78.8	0.82	323.052	[M-H]-	C00055	Cytidine 5'-monophosphate (Cytidylic acid)	Nucleotide and its derivates	19400	13500	13200	8470	18800	18800
DeB856	Negative	346.1	211.1	0.86	347.1	[M-H]-	C01367	Adenosine 3'-monophosphate	Nucleotide and its derivates	39000	36400	50100	39600	32800	48700
DeB873	Negative	565.1	323.3	1.18	566.1	[M-H]-	C00029	Uridine 5'-diphospho-D-glucose	Nucleotide and its derivates	18900000	18900000	20500000	16800000	15900000	17100000
DeB874	Negative	362.1	211.1	1.18	363.1	[M-H]-	C00144	Guanosine 5'-monophosphate	Nucleotide and its derivates	44200	55100	51200	70700	57900	65400
DeB876	Negative	150	132.9	1.18	151.049	[M-H]-	C00242	Guanine	Nucleotide and its derivates	7720	11500	9230	15300	11500	16700
DeB879	Negative	362	78.9	1.18	363.058	[M-H]-	-	Guanosine monophosphate	Nucleotide and its derivates	21800	25500	27600	22100	29400	25700
DeB882	Negative	242.086	80.9	1.19	243.086	[M-H]-	C00475	Cytidine	Nucleotide and its derivates	5170	5180	3240	5170	9	3750
DeB891	Negative	243	153.1	1.2	244.07	[M-H]-	C02067	β-Pseudouridine	Nucleotide and its derivates	42300	68100	47800	53500	46300	44900
DeB895	Negative	134.1	134.1	1.21	135.055	[M-H]-	C00147	Adenine	Nucleotide and its derivates	72900	75300	57700	86700	77600	88500
DeB912	Negative	213	78.9	1.23	214.016	[M-H]-	-	Deoxyribose 5-phosphate	Nucleotide and its derivates	9	13100	14600	22900	9	9
DeB936	Negative	267.08	135.1	1.41	268.081	[M-H]-	-	Hypoxanthine-9-β-D-arabinofuranoside	Nucleotide and its derivates	195000	193000	201000	47100	44200	52000
DeB939	Negative	243.1	110	1.42	244.07	[M-H]-	C00299	Uridine	Nucleotide and its derivates	271000	330000	275000	211000	155000	190000
DeB941	Negative	282.092	150.1	1.44	283.092	[M-H]-	C00387	Guanosine	Nucleotide and its derivates	1620000	1760000	1600000	1420000	1120000	1200000
DeB956	Negative	344.2	344	1.68	345.047	[M-H]-	C00942	Guanosine 3',5'-cyclic monophosphate	Nucleotide and its derivates	9840	14700	9760	9	9	9
DeB963	Negative	328.1	134.2	1.84	329.1	[M-H]-	C00575	Cyclic AMP	Nucleotide and its derivates	19100	16900	16300	13800	12700	12400
DeB982	Negative	266	134.2	1.97	267	[M-H]-	C00212	Adenosine	Nucleotide and its derivates	344000	376000	368000	276000	239000	246000
DeB993	Negative	382	134.1	2.17	383.108	[M-H]-	-	N6-Succinyl Adenosine	Nucleotide and its derivates	30300	32500	25500	22700	24400	25200
DeB1005	Negative	310	178.1	2.23	311.123	[M-H]-	-	2-(dimethylamino)guanosine	Nucleotide and its derivates	356000	389000	368000	341000	300000	322000
DeB222	Positive	611	287.7	2.26	611	Protonated	C08639	Cyanidin 3,5-O-diglucoside (Cyanin)	Anthocyanins	140000	118000	83700	9	9	9
DeB225	Positive	465.1	303.1	2.3	465.1	Protonated	C12138	Delphinidin 3-O-glucoside (Mirtillin)	Anthocyanins	897000	546000	399000	9	9	9
DeB243	Positive	479	317	2.42	479	Protonated	C12139	Petunidin 3-O-glucoside	Anthocyanins	109000	97500	76600	9	9	9
DeB302	Positive	493	331.7	2.81	493	Protonated	-	Malvidin 3-O-galactoside	Anthocyanins	16300	19800	17600	15200	17200	11200
DeB309	Positive	493.2	331.6	2.86	493.2	Protonated	C12140	Malvidin 3-O-glucoside (Oenin)	Anthocyanins	11800	14500	11300	10900	11500	10500
DeB389	Positive	287	231.6	3.45	287.24	Protonated	C05905	Cyanidin	Anthocyanins	109000	40500	75800	20500	30300	21700
DeB463	Positive	301.1	273.6	3.86	301.1	Protonated	C08726	Peonidin	Anthocyanins	973000	315000	930000	931000	1070000	939000
DeB1057	Negative	547.1	503.4	2.87	548.1	[M-H]-	-	Peonidin O-malonylhexoside	Anthocyanins	22100	9	28300	9	9	9
DeB354	Positive	639.1	640	3.21	638.1	[M+H]+	-	Chrysoeriol O-glucuronic acid-O-hexoside	Flavone	18700	3610	11200	9	9	9
DeB403	Positive	479.118	302.8	3.54	478.118	[M+H]+	-	Selgin 5-O-hexoside	Flavone	418000	296000	327000	35100	43500	45000
DeB482	Positive	609.4	301.7	3.93	608.4	[M+H]+	-	Chrysoeriol 7-O-rutinoside	Flavone	17200	15600	12000	9390	13200	17400
DeB493	Positive	509.3	283.6	4.02	508.3	[M+H]+	-	Syringetin 7-O-hexoside	Flavone	9	9	9	3200	9	3370
DeB502	Positive	433.1	271.7	4.05	432.1	[M+H]+	C04608	Apigenin 7-O-glucoside (Cosmosiin)	Flavone	64900	34100	50500	9	9	9
DeB521	Positive	565	317.8	4.17	564	[M+H]+	-	Selgin O-malonylhexoside	Flavone	11800	7570	11800	26400	19500	15900
DeB540	Positive	519	271.7	4.36	518	[M+H]+	-	Apigenin O-malonylhexoside	Flavone	30800	23700	41800	9	9	9
DeB549	Positive	549.1	301.7	4.43	548.1	[M+H]+	-	Chrysoeriol O-malonylhexoside	Flavone	9	9	9	9	682	1170
DeB564	Positive	551	347.4	4.55	550	[M+H]+	-	Tricetin O-malonylhexoside	Flavone	19800	14000	18000	9	9	9
DeB593	Positive	417.1	255.7	4.84	416.1	[M+H]+	-	Chrysin 5-O-glucoside (Toringin)	Flavone	4960	7680	4200	9	9	9
DeB614	Positive	503	255.6	5.24	502	[M+H]+	-	Chrysin O-malonylhexoside	Flavone	16400	12000	19900	9	9	9
DeB626	Positive	273.07	153.1	5.45	272.069	[M+H]+	C09614	Butin	Flavone	34600	27400	29700	2050	9	9
DeB631	Positive	301.063	286.1	5.56	300.063	[M+H]+	C04293	Chrysoeriol	Flavone	584000	328000	563000	519000	431000	436000
DeB693	Positive	403.132	373.1	6.84	402.132	[M+H]+	C10112	Nobiletin	Flavone	62300	60000	50800	39600	62900	53200
DeB709	Positive	373.121	373.1	7.32	372.121	[M+H]+	C10190	Tangeretin	Flavone	46200	40400	33600	28800	32900	33100
DeB1026	Negative	771.1	609.5	2.47	772.1	[M-H]-	-	Luteolin O-hexosyl-O-hexosyl-O-hexoside	Flavone	85600	101000	63400	9	9	9
DeB1064	Negative	487.1	283.2	2.93	488.1	[M-H]-	-	Acacetin O-acetyl hexoside	Flavone	41200	36800	43200	11400	12800	10300
DeB1129	Negative	535	329.4	3.68	536	[M-H]-	-	Tricin O-sinapic acid	Flavone	44800	77700	64400	51700	39200	46200
DeB1130	Negative	521.1	329.3	3.68	522.1	[M-H]-	-	Tricin O-saccharic acid	Flavone	654000	687000	742000	522000	430000	508000
DeB1163	Negative	461.1	285.2	3.88	462.1	[M-H]-	-	Chrysoeriol 5-O-hexoside	Flavone	9	9	9	131000	120000	123000
DeB1164	Negative	503.1	341.3	3.88	504.1	[M-H]-	-	Chrysoeriol O-acetylhexoside	Flavone	408000	376000	425000	9	9	6550
DeB1168	Negative	491.1	329.3	3.9	492.1	[M-H]-	-	Tricin 5-O-hexoside	Flavone	74300	81600	83400	9	9	9
DeB1203	Negative	461.1	460.9	4.17	462.1	[M-H]-	-	Chrysoeriol 7-O-hexoside	Flavone	158000	9	157000	9	9	9
DeB1283	Negative	329	314.2	5.59	330	[M-H]-	-	Tricin	Flavone	9	9	9	216000	9	9
DeB1320	Negative	283.069	268	6.77	284.069	[M-H]-	C01470	Acacetin	Flavone	9	9	9	9	9	9
DeB386	Positive	713.1	303.6	3.41	712.1	[M+H]+	-	Quercetin 7-O-malonylhexosyl-hexoside	Flavonol	11000	4490	17700	1640	2460	804
DeB422	Positive	289	215.1	3.66	288.063	[M+H]+	C01378	Fustin	Flavonol	2630	9	9	5540	9	9
DeB432	Positive	465	302.8	3.68	464.096	[M+H]+	C05623	Quercetin 3-O-glucoside (Isotrifoliin)	Flavonol	1280000	1150000	1140000	3540000	4480000	4720000
DeB443	Positive	611.2	303.7	3.73	610.2	[M+H]+	-	Quercetin 7-O-rutinoside	Flavonol	3340	5280	5060	13700	26500	26000
DeB464	Positive	479.2	317.8	3.86	478.2	[M+H]+	-	Isorhamnetin 5-O-hexoside	Flavonol	9	2770	2330	9	9	9
DeB465	Positive	449	286.9	3.86	448.101	[M+H]+	C12626	Kaempferol 3-O-galactoside (Trifolin)	Flavonol	1570000	1110000	1260000	3780000	5200000	5340000
DeB487	Positive	301.1	259.1	3.96	300.1	[M+H]+	C10098	Kaempferide	Flavonol	753000	9	9	628000	842000	627000
DeB499	Positive	449.1	287.6	4.03	448.1	[M+H]+	C12249	Kaempferol 3-O-glucoside (Astragalin)	Flavonol	62500	44300	54700	147000	234000	235000
DeB1099	Negative	319.05	193	3.36	320.053	[M-H]-	C02906	Dihydromyricetin	Flavonol	9	9	9	14800	12500	16700
DeB1115	Negative	609.153	609.1	3.51	610.153	[M-H]-	C05625	Quercetin 3-O-rutinoside (Rutin)	Flavonol	29400	31900	43300	53700	73600	53900
DeB1124	Negative	623.169	314	3.64	624.169	[M-H]-	-	Isorhamnetin 3-O-neohesperidoside	Flavonol	9	9	9	9	9	9
DeB1135	Negative	593.159	285.1	3.7	594.159	[M-H]-	-	Kaempferol 3-O-robinobioside (Biorobin)	Flavonol	9	9	8100	17500	25200	21400
DeB1147	Negative	593.159	285.1	3.77	594.159	[M-H]-	-	Kaempferol 3-O-rutinoside (Nicotiflorin)	Flavonol	9	9	9	18300	17700	25100
DeB1161	Negative	505.1	301.2	3.87	506.1	[M-H]-	-	Quercetin O-acetylhexoside	Flavonol	7880	9960	12500	37300	32500	27400
DeB1185	Negative	463	301	4.03	464.096	[M-H]-	-	Quercetin 4'-O-glucoside (Spiraeoside)	Flavonol	2510000	2870000	2630000	6230000	5670000	6010000
DeB1204	Negative	519.1	315.3	4.22	520.1	[M-H]-	-	Isorhamnetin O-acetyl-hexoside	Flavonol	13800	13000	16200	31700	25500	23500
DeB1208	Negative	431	285.1	4.29	432.106	[M-H]-	C16911	Kaempferol 3-O-rhamnoside (Kaempferin)	Flavonol	4800	5040	3470	12300	12800	13700
DeB1218	Negative	317	179	4.39	318.038	[M-H]-	C10107	Myricetin	Flavonol	19400	23500	18600	9010	6360	7660
DeB1220	Negative	287.06	125.1	4.43	288.063	[M-H]-	C00974	Aromadedrin (Dihydrokaempferol)	Flavonol	329000	318000	334000	123000	119000	122000
DeB1243	Negative	675.2	513.2	4.83	676.237	[M-H]-	C17555	Icariin (kaempferol 3,7-O-diglucoside 8-prenyl derivative)	Flavonol	75400	81200	55200	6140	9	4720
DeB1251	Negative	301.043	151.1	4.92	302.043	[M-H]-	C00389	Quercetin	Flavonol	7150	6880	5360	4180	5420	6210
DeB1254	Negative	301	151.1	4.97	302.043	[M-H]-	C10105	Morin	Flavonol	7090	7800	6170	4400	4740	5330
DeB1293	Negative	329.1	314.3	5.76	330.1	[M-H]-	-	Di-O-methylquercetin	Flavonol	402000	404000	388000	465000	396000	414000
DeB1219	Negative	657.1	495.3	4.43	658.1	[M-H]-	-	Tricin 4'-O-(syringyl alcohol) ether 5-O-hexoside	Flavonolignan	24800	25800	27600	30300	30400	28600
DeB1292	Negative	525.1	314.5	5.68	526.1	[M-H]-	-	Tricin 4'-O-β-guaiacylglycerol	Flavonolignan	9	9	9	7140	9	9
DeB278	Positive	627.1	430	2.65	626.1	[M+H]+	-	8-C-hexosyl-hesperetin O-hexoside	Flavone C-glycosides	170000	130000	120000	9	9	9
DeB370	Positive	627.1	447.3	3.33	626.1	[M+H]+	-	6-C-hexosyl-hesperetin O-hexoside	Flavone C-glycosides	167000	35900	119000	9	6690	8260
DeB391	Positive	449.1	300	3.47	448.1	[M+H]+	-	Luteolin 6-C-glucoside	Flavone C-glycosides	9	9	9	22600	9	9
DeB429	Positive	801.1	681.7	3.68	800.1	[M+H]+	-	6-C-hexosyl-apigenin O-sinapoylhexoside	Flavone C-glycosides	92500	65000	75600	9	9	9
DeB448	Positive	463.1	367.8	3.74	462.1	[M+H]+	-	Chrysoeriol 8-C-hexoside	Flavone C-glycosides	9	9	9	2200	9	9
DeB996	Negative	623.1	311.3	2.18	624.1	[M-H]-	-	Chrysoeriol C-hexosyl-O-hexoside	Flavone C-glycosides	4060	11100	4460	9	9	9
DeB1088	Negative	449.1	329.3	3.21	450.1	[M-H]-	-	Eriodictyol C-hexoside	Flavone C-glycosides	1880000	1480000	1740000	46400	37600	42000
DeB1097	Negative	447.1	327.3	3.32	448.1	[M-H]-	-	Luteolin C-hexoside	Flavone C-glycosides	9	9	9	165000	19500	9
DeB504	Positive	435.121	273.1	4.05	434.121	[M+H]+	C09099	Naringenin 7-O-glucoside (Prunin)	Flavanone	34000	29900	30300	9	9	9
DeB557	Positive	521	317.6	4.49	520	[M+H]+	-	Naringenin O-malonylhexoside	Flavanone	34900	25200	54500	2350	1580	9
DeB624	Positive	273.069	153.1	5.41	272.068	[M+H]+	C00509	Naringenin	Flavanone	30900	27400	25500	9	9	2220
DeB1095	Negative	273	97	3.29	274.084	[M-H]-	C09320	Afzelechin (3,5,7,4'-Tetrahydroxyflavan)	Flavanone	85000	78100	84000	9	9	9
DeB1165	Negative	463.132	301.1	3.88	464.132	[M-H]-	-	Hesperetin 5-O-glucoside	Flavanone	2610000	3130000	2440000	6670000	5860000	6150000
DeB1172	Negative	549.2	387.3	3.93	550.2	[M-H]-	-	Hesperetin O-malonylhexoside	Flavanone	43100	59600	60500	41800	27400	34400
DeB1179	Negative	609.19	301.1	3.99	610.19	[M-H]-	C09755	Hesperetin 7-rutinoside (Hesperidin)	Flavanone	8970	12300	19800	28200	45600	86700
DeB1193	Negative	609.2	301.3	4.09	610.19	[M-H]-	C09806	Hesperetin 7-O-neohesperidoside (Neohesperidin)	Flavanone	14700	15500	16900	44100	59700	81400
DeB1246	Negative	593	285.2	4.85	594.195	[M-H]-	C09830	Isosakuranetin-7-neohesperidoside (Poncirin)	Flavanone	9	9	9	3370	2380	51600
DeB1268	Negative	271.07	151.1	5.3	272.069	[M-H]-	C06561	Naringenin chalcone	Flavanone	17200	16700	16400	9	9	9
DeB1317	Negative	299.1	74.8	6.58	300.1	[M-H]-	-	4'-Hydroxy-5,7-dimethoxyflavanone	Flavanone	96100	78000	48800	65800	38100	52700
DeB214	Positive	369.1	177.5	2.21	368.1	[M+H]+	-	O-Feruloyl quinic acid	Quinate and its derivatives	9	9	18400	9	9	9
DeB317	Positive	369.1	177.5	2.94	368.1	[M+H]+	C02572	3-O-Feruloyl quinic acid	Quinate and its derivatives	46900	48600	41400	31600	43000	26000
DeB390	Positive	369.1	207.5	3.47	368.1	[M+H]+	-	1-O-Feruloyl quinic acid	Quinate and its derivatives	11900000	4750000	13800000	13100000	11400000	10000000
DeB902	Negative	191	85	1.22	192.063	[M-H]-	C00296	Quinic acid	Quinate and its derivatives	34100000	28600000	37200000	21800000	19000000	20700000
DeB985	Negative	543.1	191.2	2.01	544.1	[M-H]-	-	Quinic acid O-di-glucuronic acid	Quinate and its derivatives	13700	14100	14800	4060	9	9
DeB998	Negative	499.1	163.2	2.18	500.1	[M-H]-	-	5-O-p-coumaroyl quinic acid O-hexoside	Quinate and its derivatives	9	3810	4540	9	9	9
DeB1000	Negative	385.1	152.2	2.19	386.1	[M-H]-	-	Eudesmoyl quinic acid	Quinate and its derivatives	15600	9690	17200	25000	22000	25100
DeB1003	Negative	353.1	191.1	2.21	354.095	[M-H]-	-	1-O-Caffeoyl quinic acid	Quinate and its derivatives	32200000	33800000	33000000	5160000	5130000	4530000
DeB1032	Negative	353	191.1	2.53	354.095	[M-H]-	C17147	Neochlorogenic acid (5-O-Caffeoylquinic acid)	Quinate and its derivatives	48700000	53000000	49500000	8050000	7960000	7330000
DeB1038	Negative	481.1	445.4	2.6	482.1	[M-H]-	-	5-O-p-coumaroyl shikimic acid O-hexoside	Quinate and its derivatives	28500	19800	20100	6660	9	9
DeB1045	Negative	353.095	191.1	2.69	354.095	[M-H]-	C00852	Chlorogenic acid (3-O-Caffeoylquinic acid)	Quinate and its derivatives	17300000	16400000	13700000	13500000	15200000	15400000
DeB1065	Negative	353.1	191.2	2.95	354.1	[M-H]-	-	4-O-Caffeoyl quinic acid (criptochlorogenic acid)	Quinate and its derivatives	65000	82800	64900	19400	18200	19200
DeB1084	Negative	337	275.8	3.18	338	[M-H]-	-	5-O-p-Coumaroylquinic acid	Quinate and its derivatives	370000	402000	356000	52300	53700	47500
DeB1106	Negative	337.1	190.9	3.44	338.1	[M-H]-	-	3-O-p-Coumaroyl quinic acid	Quinate and its derivatives	2000000	2310000	2170000	2020000	1580000	1670000
DeB1127	Negative	367	179.1	3.67	368.111	[M-H]-	-	Chlorogenic acid methyl ester	Quinate and its derivatives	9	9	9	10000000	11100000	10700000
DeB10	Positive	140	98.9	0.63	139.027	[M+H]+	C00870	4-Nitrophenol	Others	693000	631000	369000	1220000	2030000	1750000
DeB20	Positive	106	88.1	0.68	105.079	[M+H]+	C06772	Diethanolamine	Others	28400	20000	33400	19500	24400	23000
DeB89	Positive	130	88.9	0.86	129.101	[M+H]+	C07151	1,1-Dimethylbiguanide	Others	11800	9	3950	7570	9	10600
DeB151	Positive	137	110	1.37	136.039	[M+H]+	-	Allopurinol	Others	19400	10400	15100	9	5740	9
DeB185	Positive	136.1	119.3	1.83	135.1	[M+H]+	-	Aminopurine	Others	71400	53700	54400	37300	43900	39900
DeB204	Positive	374.1	198.6	2.12	373.1	[M+H]+	C04831	DIMBOA glucoside	Others	38700	41300	34400	24000	78900	32200
DeB212	Positive	122	105.3	2.19	121	[M+H]+	C09815	Benzamide	Others	9	9	9	9	6240	6180
DeB230	Positive	474.2	327.8	2.34	473.2	[M+H]+	C00234	10-Formyl-THF	Others	119000	86700	63000	54000	114000	112000
DeB238	Positive	122.1	105	2.39	121.089	[M+H]+	C05332	Phenethylamine	Others	9	2290	2840	3510	10500	7910
DeB314	Positive	491.1	329.7	2.92	490.1	[M+H]+	-	Anisic acid O-feruloyl hexoside	Others	5260	2780	7680	4420	4010	5200
DeB420	Positive	503.2	311.8	3.64	502.2	[M+H]+	-	Phellodensin F	Others	152000	75100	192000	68700	67200	86000
DeB669	Positive	343.1	240.9	6.39	342.1	[M+H]+	-	Cocamidopropyl betaine	Others	34000	36700	34400	39700	31900	26700
DeB714	Positive	387.1	331.8	7.48	386.1	[M+H]+	C00187	Cholesterol	Others	61600	155000	71100	78200	76900	40600
DeB763	Positive	149	121.3	9.57	148	[M+H]+	-	Phthalic anhydride	Others	73200	107000	63600	55000	60600	76200
DeB776	Positive	371.1	267.1	11.45	370.105	[M+H]+	-	sesamolin	Others	135000	202000	130000	106000	109000	97000
DeB791	Negative	179.157	87	0.74	180.063	[M-H]-	C00137	Inositol	Others	684000	774000	642000	808000	781000	872000
DeB807	Negative	140	78.5	0.76	141.019	[M-H]-	-	O-Phosphorylethanolamine	Others	11100	16400	12800	8800	12000	8890
DeB904	Negative	742.1	620.2	1.22	743.075	[M-H]-	C00006	NADP	Others	114000	111000	155000	118000	133000	133000
DeB1086	Negative	593.16	431.1	3.19	594.159	[M-H]-	C08064	Isovitexin 7-O-glucoside (Saponarin)	Others	9	9	9	9	9	9
DeB1210	Negative	717.6	520.1	4.32	718.153	[M-H]-	-	lithospermic acid B	Others	14600	16200	15400	13100	9320	11700
DeB1225	Negative	405.13	242.2	4.48	406.13	[M-H]-	-	E-3,4,5'-Trihydroxy-3'-glucopyranosylstilbene	Others	11500	13800	14900	9	9	9
DeB1237	Negative	533.3	371.2	4.71	534.21	[M-H]-	C16915	Arctiin	Others	141000	158000	140000	9	9	9
DeB334	Positive	195.1	177.5	3.08	194.1	[M+H]+	-	Hydroxy-methoxycinnamate	Hydroxycinnamoyl derivatives	247000	42500	273000	56800	46200	63800
DeB339	Positive	207.1	147.4	3.1	206.1	[M+H]+	-	6-Hydroxymethylherniarin	Hydroxycinnamoyl derivatives	2700	9	4460	2890	1110	4280
DeB371	Positive	375.2	137.6	3.34	374.2	[M+H]+	-	Feruloyl syringic acid	Hydroxycinnamoyl derivatives	82200	17700	58100	39600	36000	39000
DeB650	Positive	165.1	95.5	5.88	164.1	[M+H]+	C10945	Caffeic aldehyde	Hydroxycinnamoyl derivatives	211000	245000	232000	182000	171000	188000
DeB995	Negative	311.1	149.2	2.18	312.1	[M-H]-	-	Caftaric acid	Hydroxycinnamoyl derivatives	6940	9	9	3350	9	4080
DeB999	Negative	665.1	323.4	2.19	666.1	[M-H]-	-	O-Caffeoyl maltotriose	Hydroxycinnamoyl derivatives	15800	15400	15600	12400	10700	13500
DeB1053	Negative	371.1	209.2	2.8	372.142	[M-H]-	C01533	Syringin	Hydroxycinnamoyl derivatives	668000	786000	702000	132000	114000	114000
DeB1073	Negative	341	179.2	3.03	342	[M-H]-	-	Caffeic acid O-glucoside	Hydroxycinnamoyl derivatives	920000	867000	963000	514000	499000	472000
DeB1079	Negative	385.1	223.2	3.1	386.1	[M-H]-	-	1-O-beta-D-Glucopyranosyl sinapate	Hydroxycinnamoyl derivatives	5870	4710	9	49400	45200	46700
DeB1080	Negative	179.042	135.1	3.14	180.042	[M-H]-	C01197	Caffeic acid	Hydroxycinnamoyl derivatives	4990000	3030000	4880000	216000	164000	179000
DeB1091	Negative	167	152.1	3.26	168	[M-H]-	C06672	Vanillic acid	Hydroxycinnamoyl derivatives	205000	153000	196000	69200	59700	56700
DeB1092	Negative	197.053	122.9	3.27	198.053	[M-H]-	C10833	Syringic acid	Hydroxycinnamoyl derivatives	9	9	9	9	9	9
DeB1114	Negative	149	130.1	3.5	150.068	[M-H]-	C02646	p-Coumaryl alcohol	Hydroxycinnamoyl derivatives	32500	32500	33000	32000	26100	31100
DeB1137	Negative	163.047	119	3.71	164.047	[M-H]-	C00811	p-Coumaric acid	Hydroxycinnamoyl derivatives	995000	803000	1020000	372000	320000	327000
DeB1138	Negative	179.079	146.1	3.71	180.079	[M-H]-	C00590	Coniferyl alcohol	Hydroxycinnamoyl derivatives	28400	26400	31200	229000	219000	211000
DeB1170	Negative	193.058	134.1	3.92	194.058	[M-H]-	C01494	Ferulic acid	Hydroxycinnamoyl derivatives	241000	224000	232000	445000	387000	403000
DeB1182	Negative	193.058	134.1	4.01	194.058	[M-H]-	-	3-Hydroxy-4-methoxycinnamic acid	Hydroxycinnamoyl derivatives	211000	204000	212000	347000	323000	337000
DeB1192	Negative	151.047	136.1	4.08	152.047	[M-H]-	-	2-Methoxybenzoic acid	Hydroxycinnamoyl derivatives	9	9	9	9	9	9
DeB1221	Negative	207.1	177.1	4.43	208.074	[M-H]-	-	Sinapinaldehyde	Hydroxycinnamoyl derivatives	21200	18200	23800	18500	17500	23500
DeB1224	Negative	177.063	177.1	4.46	178.063	[M-H]-	C02666	Coniferylaldehyde	Hydroxycinnamoyl derivatives	330000	301000	328000	191000	162000	169000
DeB1240	Negative	591.1	367.4	4.79	592.1	[M-H]-	-	Disinapoyl hexoside	Hydroxycinnamoyl derivatives	12500	15200	11500	23400	23500	23100
DeB1265	Negative	357.142	136.1	5.18	358.142	[M-H]-	-	Pinoresinol	Hydroxycinnamoyl derivatives	130000	125000	124000	101000	94400	95500
DeB1266	Negative	147.052	61.8	5.22	148.052	[M-H]-	C00423	Cinnamic acid	Hydroxycinnamoyl derivatives	24900	26400	22700	17300	16400	18500
DeB1272	Negative	177	145.2	5.36	178	[M-H]-	-	4-Methoxycinnamic acid	Hydroxycinnamoyl derivatives	8160000	7140000	7860000	494000	367000	398000
DeB1279	Negative	207.1	192.1	5.53	208.1	[M-H]-	-	3,4-Dimethoxycinnamic acid	Hydroxycinnamoyl derivatives	453000	436000	459000	87400	78000	84800
DeB176	Positive	177	160.2	1.66	176.095	[M+H]+	C00780	serotonin	Tryptamine derivatives	9	4120	3780	25900	35200	37200
DeB292	Positive	161.1	144.2	2.75	160.1	[M+H]+	C00398	L-Tryptamine	Tryptamine derivatives	9	4150	3980	3010	5270	5780
DeB332	Positive	219	160.1	3.06	218.106	[M+H]+	C00978	N-Acetyl-5-hydroxytryptamine	Tryptamine derivatives	21100	9	22000	26800	27200	37500
DeB428	Positive	219.1	189.5	3.68	218.1	[M+H]+	C08309	5-Methoxy-N,N-dimethyltryptamine	Tryptamine derivatives	8670	1920	8400	9	3980	14300
DeB574	Positive	353.1	177.5	4.63	352.1	[M+H]+	-	N-Feruloyl serotonin	Tryptamine derivatives	9	9	9	9	9	9
DeB80	Positive	118.1	118.1	0.81	117.079	[M+H]+	C00719	Betaine	Alkaloids	19500000	13400000	15600000	10800000	15800000	13800000
DeB100	Positive	86.1	56	1.17	85.1	[M+H]+	C01746	Piperidine	Alkaloids	426000	325000	331000	520000	565000	545000
DeB86	Positive	222	138.1	0.83	221.09	[M+H]+	C00140	N-Acetyl-D-glucosamine	Carbohydrates	18900	20900	28300	24400	20100	22300
DeB777	Negative	195.157	75.1	0.59	196.058	[M-H]-	C00257	Gluconic acid	Carbohydrates	384000	355000	427000	532000	438000	449000
DeB810	Negative	649.1	503.3	0.77	650.1	[M-H]-	-	D(+)-Melezitose O-rhamnoside	Carbohydrates	16800	12400	17500	23400	10500	22800
DeB817	Negative	503.442	323.2	0.77	504.169	[M-H]-	-	D(+)-Melezitose	Carbohydrates	82300	109000	102000	114000	87400	111000
DeB819	Negative	179	70.9	0.77	180.063	[M-H]-	C00031	D(+)-Glucose	Carbohydrates	870000	723000	817000	1230000	738000	750000
DeB828	Negative	341	58.8	0.78	342.116	[M-H]-	-	D-(+)-Sucrose	Carbohydrates	12700000	14700000	12600000	14600000	12500000	14200000
DeB829	Negative	177.14	74.8	0.78	178.048	[M-H]-	C01040	L-Gulonic-γ-lactone	Carbohydrates	13700	13300	22900	22700	17300	13000
DeB839	Negative	193.141	72.9	0.8	194.043	[M-H]-	C00191	D-glucoronic acid	Carbohydrates	57800	45000	61500	80700	54000	56300
DeB841	Negative	149	58.9	0.81	150.053	[M-H]-	-	DL-Arabinose	Carbohydrates	411000	380000	403000	395000	343000	358000
DeB844	Negative	177.14	70.8	0.82	178.048	[M-H]-	C00198	D-(+)-Glucono-1,5-lactone	Carbohydrates	54400	40600	40500	43300	44100	35100
DeB848	Negative	421.1	241.2	0.83	422.1	[M-H]-	C00689	Trehalose 6-phosphate	Carbohydrates	52900	46100	63200	52600	43500	44200
DeB855	Negative	163	70.8	0.85	164.069	[M-H]-	C01019	L-Fucose	Carbohydrates	22500	9	9	9	19200	16100
DeB858	Negative	213.1	78.9	0.97	214.1	[M-H]-	C00672	2-Deoxyribose 1-phosphate	Carbohydrates	164000	140000	147000	217000	229000	218000
DeB860	Negative	259	96.9	0.99	260.03	[M-H]-	C00092	D-Glucose 6-phosphate	Carbohydrates	1530000	1540000	1620000	1210000	1300000	1180000
DeB869	Negative	289.1	97	1.16	290.1	[M-H]-	-	Glucarate O-Phosphoric acid	Carbohydrates	438000	9	344000	208000	92400	151000
DeB102	Positive	332.1	314.7	1.18	331.1	[M+H]+	-	Pyridoxine O-glucoside	Vitamins	1520000	1720000	1820000	1950000	1850000	1750000
DeB130	Positive	170.1	134.1	1.22	169.074	[M+H]+	C00314	Pyridoxine	Vitamins	1620000	1140000	955000	768000	1240000	1170000
DeB139	Positive	157	111	1.25	156.017	[M+H]+	C00295	Orotic acid	Vitamins	122000	38900	62100	24100	49900	64300
DeB163	Positive	123.1	80.3	1.47	122.1	[M+H]+	C00153	Niacinamide	Vitamins	300000	226000	217000	257000	386000	338000
DeB167	Positive	346	184.5	1.51	345	[M+H]+	-	4-Pyridoxic acid O-hexoside	Vitamins	12000	12300	12900	17500	16300	12400
DeB213	Positive	220.2	202.7	2.19	219.2	[M+H]+	C00864	D-Pantothenic acid	Vitamins	4490000	4420000	4800000	5600000	5420000	5710000
DeB355	Positive	245.09	227.1	3.21	244.088	[M+H]+	C00120	Biotin	Vitamins	9	3120	9	37300	50200	60500
DeB409	Positive	138.05	78	3.58	137.048	[M+H]+	-	Nicotinic Acid Methyl Ester (Methyl Nicotinate)	Vitamins	27500	20600	28900	7500	20400	12800
DeB729	Positive	301.2	133.1	8.15	300.209	[M+H]+	C16683	4-Oxoretinol	Vitamins	211	295	292	453	279	237
DeB773	Positive	445.3	281	10.58	444.303	[M+H]+	C00828	Menaquinone (K2)	Vitamins	80400	131000	83600	86900	75800	83100
DeB789	Negative	263.1	147.2	0.74	264.1	[M-H]-	C00378	Thiamine	Vitamins	21000	15400	22500	26200	15900	25800
DeB1078	Negative	375	255.2	3.09	376.138	[M-H]-	C00255	Riboflavin	Vitamins	22000	24200	20300	39000	39400	33600
DeB1271	Negative	383	281.1	5.35	384.339	[M-H]-	C05443	Vitamin D3	Vitamins	47200	37300	39600	42100	47700	41300
DeB267	Positive	341	179.1	2.58	340.079	[M+H]+	C09264	Esculin (6,7-Dihydroxycoumarin-6-glucoside)	Coumarins	25800	33500	45300	8380	5860	8230
DeB289	Positive	353.1	272.8	2.73	352.1	[M+H]+	-	6,7-dihydroxycoumarin 6-O-quinic acid	Coumarins	259000	281000	248000	79000	91000	49900
DeB331	Positive	339.1	177.5	3.06	338.1	[M+H]+	-	O-Feruloyl 2-hydroxylcoumarin	Coumarins	1440000	320000	2060000	68400	59700	47600
DeB388	Positive	209.2	194.1	3.45	208.037	[M+H]+	C09265	6-Methoxy-7,8-DihydroxyCoumarin	Coumarins	9	9	20400	48700	46800	60500
DeB447	Positive	339.1	177.5	3.74	338.1	[M+H]+	-	O-Feruloyl 4-hydroxylcoumarin	Coumarins	278000	185000	317000	9	9	9
DeB555	Positive	177.047	121	4.46	176.047	[M+H]+	C03081	4-Methylumbelliferone	Coumarins	51200	20400	58100	16100	11400	14200
DeB1019	Negative	351.1	132.6	2.41	352.1	[M-H]-	-	6,7-dihydroxycoumarin 7-O-quinic acid	Coumarins	561000	544000	510000	72900	71200	73700
DeB1083	Negative	177	133.1	3.17	178.027	[M-H]-	C09263	Esculetin (6,7-dihydroxycoumarin)	Coumarins	36400	25500	48800	9	9	9
DeB1180	Negative	191	176.1	4	192.042	[M-H]-	C01752	Scopoletin (7-Hydroxy-5-methoxycoumarin)	Coumarins	73800	63000	81700	113000	76700	76800
DeB1209	Negative	337.1	143.2	4.31	338.1	[M-H]-	-	4-Hydroxy-7-methoxycoumarin-beta-rhamnoside	Coumarins	9	9	9	9	9	9
DeB69	Positive	256.2	124	0.8	255.2	[M+H]+	C05841	Nicotinate ribonucleoside	Nicotinic acid derivatives	191000	161000	179000	128000	189000	206000
DeB189	Positive	286	124.3	1.9	285	[M+H]+	-	Nicotinic acid-hexoside	Nicotinic acid derivatives	94400	74200	78800	30200	64000	51200
DeB884	Negative	122	77.9	1.19	123	[M-H]-	C00253	Nicotinic acid	Nicotinic acid derivatives	270000	271000	257000	262000	212000	256000
DeB1103	Negative	445	282.1	3.42	446.121	[M-H]-	C16195	Glycitin	Isoflavone	205000	238000	204000	420000	394000	341000
DeB1248	Negative	283	268.1	4.89	284.069	[M-H]-	C14536	Glycitein	Isoflavone	9	9	9	27000	24800	23600
DeB1257	Negative	283	268.2	5.01	284.069	[M-H]-	C01562	Calycosin	Isoflavone	9	9	9	30200	25500	27900
DeB1308	Negative	267.074	252.1	6.1	268.074	[M-H]-	C00858	Formononetin (4'-O-methyldaidzein)	Isoflavone	9	9	9	11900	13400	11300
DeB1325	Negative	283	268.1	6.95	284.069	[M-H]-	C10521	Prunetin	Isoflavone	9	9	9	9	9	9
DeB235	Positive	206.1	147.5	2.39	205.1	[M+H]+	C05660	Methoxyindoleacetic acid	Indole derivatives	85800	103000	95700	307000	298000	328000
DeB241	Positive	118	58.2	2.41	117	[M+H]+	C00463	Indole	Indole derivatives	5440	6390	4670	14500	27600	19500
DeB530	Positive	176.1	133.5	4.26	175.1	[M+H]+	-	1-Methoxyindole-3-carbaldehyde	Indole derivatives	8540	4380	8380	10900	7080	8990
DeB541	Positive	146.1	118.1	4.36	145.053	[M+H]+	C08493	Indole-3-carboxaldehyde	Indole derivatives	14500	12400	9540	16000	20300	19900
DeB1189	Negative	160.05	116	4.07	161.048	[M-H]-	-	Indole-5-carboxylic acid	Indole derivatives	9	17000	17100	30700	23000	24600
DeB23	Positive	104.06	87	0.69	103.063	[M+H]+	C00334	γ-aminobutyric acid	Organic acids	182000	187000	185000	504000	526000	497000
DeB84	Positive	146.085	85.9	0.82	145.085	[M+H]+	C01035	4-Guanidinobutyric acid	Organic acids	145000	112000	83700	106000	179000	168000
DeB92	Positive	98.9	81.1	0.89	97.9	[M+H]+	C00009	Phosphoric acid	Organic acids	1900000	1260000	1860000	1390000	1630000	1350000
DeB93	Positive	132.095	76.9	0.93	131.095	[M+H]+	C02378	6-Aminocaproic acid	Organic acids	156000	141000	142000	216000	331000	268000
DeB125	Positive	124.03	77.8	1.21	123.032	[M+H]+	C10164	2-Picolinic acid	Organic acids	48400	29600	31400	18000	31400	27700
DeB169	Positive	146.074	85.8	1.58	145.074	[M+H]+	-	4-Acetamidobutyric acid	Organic acids	84400	57200	53400	48500	100000	75600
DeB218	Positive	477.2	258.1	2.23	476.168	[M+H]+	C12276	D-Pantothenic dcid	Organic acids	56200	31500	25600	47300	72700	66400
DeB275	Positive	190.043	144	2.62	189.043	[M+H]+	C01717	Kynurenic acid	Organic acids	34900	32500	36800	25700	24600	23700
DeB288	Positive	341.079	179.4	2.73	340.079	[M+H]+	C02887	Sinapoyl malate	Organic acids	9	9	9	16900	10900	9210
DeB324	Positive	139.03	50.3	2.98	138.032	[M+H]+	C00156	4-Hydroxybenzoic acid	Organic acids	9	9	21800	9	16500	9
DeB349	Positive	153.047	135.3	3.19	152.047	[M+H]+	-	o-Anisic acid	Organic acids	10200	1470	2950	9	9	9
DeB531	Positive	189.105	97	4.27	188.105	[M+H]+	C08261	Azelaic acid	Organic acids	28900	9830	34300	71100	48100	63700
DeB651	Positive	151.068	78.8	5.88	150.068	[M+H]+	-	4-Ethylbenzoic acid	Organic acids	9	2250	9	9	9	9
DeB770	Positive	556.28	371.2	10.06	555.284	[M+H]+	C05122	Taurocholic acid	Organic acids	8730	7800	7830	7210	8170	8630
DeB778	Negative	141.03	58.7	0.63	142.027	[M-H]-	-	trans,trans-Muconic acid	Organic acids	1310000	1290000	1400000	3190000	2960000	2950000
DeB794	Negative	124	79.7	0.75	125.015	[M-H]-	C00245	2-Aminoethanesulfonic acid	Organic acids	27600	19200	15200	18800	18400	28400
DeB809	Negative	145.06	74	0.77	146.06	[M-H]-	-	Methylglutaric acid	Organic acids	9980	6390	8460	17000	12900	11800
DeB820	Negative	130.07	88	0.77	131.07	[M-H]-	C00300	Creatine	Organic acids	92400	109000	101000	95800	89700	99100
DeB822	Negative	166.037	124.1	0.77	167.037	[M-H]-	-	Guanidinoethyl sulfonate	Organic acids	9	4390	4530	3980	9	4690
DeB847	Negative	289.1	191.2	0.83	290.1	[M-H]-	C03406	Argininosuccinate	Organic acids	39000	39800	38400	34600	33900	34600
DeB849	Negative	117	99.8	0.83	118.027	[M-H]-	-	D-Erythronolactone	Organic acids	113000	154000	138000	43100	53700	47200
DeB861	Negative	147	85	1	148	[M-H]-	C00815	Citramalate	Organic acids	44400	9	9	9	9	9
DeB880	Negative	165.05	74.9	1.18	166.048	[M-H]-	-	D-Xylonic acid	Organic acids	112000	133000	101000	214000	171000	194000
DeB886	Negative	89	68.9	1.19	90.032	[M-H]-	C01013	3-Hydroxypropanoic acid	Organic acids	31900	22700	24400	25100	16000	20900
DeB903	Negative	145	80.8	1.22	146.022	[M-H]-	-	A-Ketoglutaric acid	Organic acids	927000	793000	916000	1080000	1010000	1150000
DeB905	Negative	161	160.9	1.22	162.016	[M-H]-	C01127	4-Hydroxy-2-oxoglutaric acid	Organic acids	41700	33700	40000	24000	39100	27500
DeB906	Negative	118	73.9	1.22	119.022	[M-H]-	C00872	Aminomalonic acid	Organic acids	1110000	1120000	1130000	2220000	2110000	2030000
DeB919	Negative	115	97.9	1.24	116.011	[M-H]-	C00122	Fumaric acid	Organic acids	182000	149000	206000	382000	376000	384000
DeB928	Negative	117.03	99.9	1.31	118.027	[M-H]-	C00042	Succinic acid	Organic acids	30700000	31700000	31700000	58100000	52600000	54200000
DeB935	Negative	103.047	103	1.39	104.047	[M-H]-	-	3-Hydroxybutyrate	Organic acids	1890000	1430000	1800000	1830000	1650000	1690000
DeB947	Negative	117.02	100	1.55	118.027	[M-H]-	C02170	Methylmalonic acid	Organic acids	29600000	31200000	31400000	58400000	52500000	54700000
DeB957	Negative	153	78.9	1.72	154	[M-H]-	C06608	Diethyl phosphate	Organic acids	111000	290000	147000	163000	139000	114000
DeB965	Negative	350.1	144.2	1.85	351.1	[M-H]-	-	Kynurenic acid O-hexside	Organic acids	10400	8300	11600	17000	14100	10600
DeB969	Negative	131.042	86.9	1.89	132.042	[M-H]-	C00489	Glutaric acid	Organic acids	276000	286000	279000	1060000	956000	1030000
DeB988	Negative	117.1	99.9	2.06	118.063	[M-H]-	-	3-Hydroxy-3-methyl butyric acid	Organic acids	104000	126000	132000	105000	119000	93500
DeB991	Negative	131.042	86.9	2.15	132.042	[M-H]-	-	2-Methylsuccinic acid	Organic acids	2950000	3140000	3050000	1890000	1680000	1880000
DeB1001	Negative	167.1	122.1	2.2	168.042	[M-H]-	C00544	Homogentisic acid	Organic acids	30500	25700	38300	9	9	6620
DeB1023	Negative	145.058	80.9	2.43	146.058	[M-H]-	C06104??	Adipic acid	Organic acids	414000	357000	409000	553000	540000	509000
DeB1036	Negative	145.06	101.1	2.58	146.058	[M-H]-	-	2-Methylglutaric acid	Organic acids	417000	430000	452000	583000	532000	545000
DeB1048	Negative	175.1	131.3	2.73	176.1	[M-H]-	C02504	2-Isopropylmalate	Organic acids	64100	67500	70300	293000	226000	232000
DeB1062	Negative	165.027	121.1	2.91	166.027	[M-H]-	C06337	Terephthalic acid	Organic acids	841000	968000	941000	1460000	1330000	1260000
DeB1066	Negative	165.027	76.9	2.97	166.027	[M-H]-	C01606	Phthalic acid	Organic acids	85400	98700	101000	155000	132000	140000
DeB1139	Negative	173.1	83	3.71	174.089	[M-H]-	C08278	Suberic acid	Organic acids	33100	29900	33200	46900	46700	40400
DeB1146	Negative	164.04	92	3.76	165.043	[M-H]-	-	2-(Formylamino)benzoic acid	Organic acids	92100	80500	99600	59600	29600	39300
DeB1200	Negative	359.3	161	4.15	360.3	[M-H]-	C01850	Rosmarinic acid	Organic acids	20900	18900	14900	26600	22500	22700
DeB1207	Negative	187.105	125.1	4.27	188.105	[M-H]-	C08261	Azelaic Acid	Organic acids	1140000	1070000	1170000	2020000	1830000	1850000
DeB1304	Negative	229.152	167.2	5.95	230.152	[M-H]-	C02678	Dodecanedioic aicd	Organic acids	9	9	9	9	2740	3310
DeB1058	Negative	577.1	407.3	2.87	578.142	[M-H]-	-	Procyanidin B3	Proanthocyanidins	9	9	9	23000	22300	18200
DeB1076	Negative	577	407.3	3.08	578.142	[M-H]-	-	Procyanidin B2	Proanthocyanidins	9	9	9	38900	46800	42200
DeB704	Positive	492.3	184.5	7.17	491.3	[M+H]+	-	LysoPC 16:2 (2n isomer)	Lipids_Glycerophospholipids	10700	8540	7720	3930	2530	9
DeB717	Positive	518.2	500.3	7.54	517.2	[M+H]+	-	LysoPC 18:3 (2n isomer)	Lipids_Glycerophospholipids	2310000	2010000	2250000	490000	368000	448000
DeB722	Positive	494.3	184.6	7.71	493.3	[M+H]+	-	LysoPC 16:1 (2n isomer)	Lipids_Glycerophospholipids	22800	23700	27500	15500	9700	8250
DeB725	Positive	520	125	8.08	519	[M+H]+	-	LysoPC 18:2 (2n isomer)	Lipids_Glycerophospholipids	1140000	988000	1120000	408000	246000	296000
DeB727	Positive	482.3	184.5	8.1	481.3	[M+H]+	-	LysoPC 15:0	Lipids_Glycerophospholipids	14700	20500	15800	8780	6340	6080
DeB731	Positive	478.6	337.9	8.2	477.6	[M+H]+	-	LysoPE 18:2 (2n isomer)	Lipids_Glycerophospholipids	265000	208000	206000	49400	46500	54600
DeB735	Positive	520.3	502.3	8.27	519.3	[M+H]+	-	LysoPC 18:2	Lipids_Glycerophospholipids	406000	352000	397000	216000	176000	215000
DeB741	Positive	496.33	478.3	8.49	495.33	[M+H]+	-	LysoPC 16:0 (2n isomer)	Lipids_Glycerophospholipids	289000	467000	312000	160000	129000	149000
DeB742	Positive	454.2	314	8.56	453.2	[M+H]+	-	LysoPE 16:0	Lipids_Glycerophospholipids	429000	3580000	387000	81700	86500	95200
DeB745	Positive	518.3	459.6	8.65	517.3	[M+H]+	-	LysoPC 18:3	Lipids_Glycerophospholipids	321000	983000	323000	129000	111000	115000
DeB746	Positive	496.3	478.3	8.65	495.3	[M+H]+	-	LysoPC 16:0	Lipids_Glycerophospholipids	2000000	6000000	2310000	947000	695000	801000
DeB748	Positive	480.1	339.9	8.69	479.1	[M+H]+	-	LysoPE 18:1	Lipids_Glycerophospholipids	1860	3240	2550	9	9	9
DeB749	Positive	522.4	184.5	8.76	521.4	[M+H]+	-	LysoPC 18:1 (2n isomer)	Lipids_Glycerophospholipids	551000	667000	541000	228000	172000	232000
DeB754	Positive	544.4	544.4	8.89	543.4	[M+H]+	-	LysoPC 20:4	Lipids_Glycerophospholipids	39800	39200	32700	13400	12600	17600
DeB761	Positive	510.1	510.4	9.22	509.1	[M+H]+	-	LysoPC 17:0	Lipids_Glycerophospholipids	9	27200	5920	9	9	1290
DeB764	Positive	524.36	507.4	9.57	523.36	[M+H]+	-	LysoPC 18:0	Lipids_Glycerophospholipids	13400	67200	13400	4290	3270	3930
DeB765	Positive	482.1	341.9	9.69	481.1	[M+H]+	-	LysoPE 18:0	Lipids_Glycerophospholipids	863	10500	1010	9	9	9
DeB1343	Negative	452.3	255.3	8.4	453.3	[M-H]-	-	LysoPE 16:0 (2n isomer)	Lipids_Glycerophospholipids	85100	406000	75900	22100	23700	23300
DeB1345	Negative	478.1	281.3	8.69	479.1	[M-H]-	-	LysoPE 18:1 (2n isomer)	Lipids_Glycerophospholipids	112000	141000	87400	11400	13900	14200
DeB710	Positive	696.4	696.2	7.41	695.4	[M+H]+	-	DGMG (18:2) isomer2	Lipids_Glycerolipids	13800	16300	17300	2330	1580	1660
DeB711	Positive	353.3	261.8	7.41	352.3	[M+H]+	-	MAG (18:3) isomer5	Lipids_Glycerolipids	1180000	1280000	975000	132000	106000	130000
DeB712	Positive	694.1	335.8	7.41	693.1	[M+H]+	-	DGMG (18:1)	Lipids_Glycerolipids	148000	143000	140000	21000	16200	18000
DeB723	Positive	696.4	337.8	7.92	695.4	[M+H]+	-	DGMG (18:2) isomer1	Lipids_Glycerolipids	661000	711000	584000	167000	80900	104000
DeB728	Positive	696.4	696.3	8.12	695.4	[M+H]+	-	DGMG (18:2) isomer3	Lipids_Glycerolipids	123000	134000	138000	80200	44900	47700
DeB730	Positive	353.1	261.8	8.16	352.1	[M+H]+	-	MAG (18:3) isomer2	Lipids_Glycerolipids	318000	370000	282000	39400	39100	39300
DeB734	Positive	355.1	263.8	8.27	354.1	[M+H]+	-	MAG (18:2) isomer1	Lipids_Glycerolipids	38700	39200	37600	22000	18300	25700
DeB738	Positive	353.3	335.8	8.43	352.3	[M+H]+	-	MAG (18:3) isomer3	Lipids_Glycerolipids	937000	875000	893000	193000	195000	260000
DeB743	Positive	357.2	339.9	8.57	356.2	[M+H]+	-	MAG (18:1) isomer1	Lipids_Glycerolipids	25500	41600	22800	9	9	3460
DeB750	Positive	357.2	339.9	8.79	356.2	[M+H]+	-	MAG (18:1) isomer2	Lipids_Glycerolipids	73100	107000	73200	17900	14800	15600
DeB753	Positive	534.1	338	8.87	533.1	[M+H]+	-	MGMG (18:2) isomer2	Lipids_Glycerolipids	44000	46100	44000	10000	8210	8010
DeB758	Positive	534.4	262.9	9.04	533.4	[M+H]+	-	MGMG (18:2) isomer1	Lipids_Glycerolipids	113000	122000	111000	48200	42800	62000
DeB766	Positive	353.1	173.7	9.77	352.1	[M+H]+	-	MAG (18:3) isomer4	Lipids_Glycerolipids	40400	48500	30100	5340	5540	5730
DeB768	Positive	353.2	261.8	9.91	352.2	[M+H]+	-	MAG (18:3) isomer1	Lipids_Glycerolipids	619000	658000	485000	221000	246000	227000
DeB771	Positive	355.1	337.9	10.36	354.1	[M+H]+	-	MAG (18:2)	Lipids_Glycerolipids	692000	873000	576000	148000	186000	169000
DeB679	Positive	291	273.9	6.55	290	[M+H]+	-	4-oxo-9Z,11Z,13E,15E-octadecatetraenoic acid	Lipids_Fatty acids	9	9	9	9	9	9
DeB739	Positive	277.216	157.4	8.45	276.216	[M+H]+	-	14,15-Dehydrocrepenynic acid	Lipids_Fatty acids	91300	89100	87700	80600	80100	81400
DeB751	Positive	279.3	201.5	8.81	278.3	[M+H]+	C08364	Punicic acid	Lipids_Fatty acids	271000	264000	263000	426000	436000	441000
DeB759	Positive	295.2	179.5	9.17	294.2	[M+H]+	-	9-Hydroxy-(10E,12Z,15Z)-octadecatrienoic acid	Lipids_Fatty acids	101000	111000	109000	115000	89700	95500
DeB762	Positive	279.2	149.4	9.55	278.2	[M+H]+	-	Octadeca-11E,13E,15Z-trienoic acid	Lipids_Fatty acids	4400000	5790000	3900000	3580000	3540000	4310000
DeB772	Positive	279.2	201.5	10.47	278.2	[M+H]+	C06427	α-Linolenic acid	Lipids_Fatty acids	163000	163000	135000	116000	78100	129000
DeB1316	Negative	239	223	6.55	240.245	[M-H]-	C00517	Palmitaldehyde	Lipids_Fatty acids	2420000	1870000	1150000	1620000	989000	1450000
DeB1333	Negative	309.1	291.4	7.39	310.1	[M-H]-	-	9-HpOTrE	Lipids_Fatty acids	9890	8650	10500	9810	10100	6140
DeB1336	Negative	293	193.2	7.66	294	[M-H]-	-	13-HOTrE(r)	Lipids_Fatty acids	42600	46600	47300	49000	42900	39700
DeB1338	Negative	311.1	293.4	7.71	312.1	[M-H]-	C04717	13-HPODE	Lipids_Fatty acids	12400	11000	12300	9480	8160	8100
DeB1339	Negative	309	291.5	7.98	310	[M-H]-	-	13-HpOTrE(r)	Lipids_Fatty acids	5150	6140	5490	8540	6060	6480
DeB1342	Negative	293	275.4	8.29	294	[M-H]-	-	9-HOTrE	Lipids_Fatty acids	39500	41800	41600	23700	20100	20800
DeB1347	Negative	295	183.3	8.82	296	[M-H]-	-	9,10-EODE	Lipids_Fatty acids	295000	290000	334000	417000	347000	337000
DeB1350	Negative	199	181.3	9.52	200	[M-H]-	C02679	Lauric acid (C12:0)	Lipids_Fatty acids	3350	3990	3410	3510	2780	3240
DeB170	Positive	348.1	187.7	1.6	347.1	[M+H]+	-	Kinetin 9-riboside	Phytohormones	8630	9	9	6260	9	9
DeB706	Positive	225.1	133.1	7.23	224.141	[M+H]+	C11512	Methyl jasmonate	Phytohormones	6150	8030	7200	7390	8220	5890
DeB976	Negative	299.1	137.2	1.96	300.1	[M-H]-	-	Salicylic acid O-glucoside	Phytohormones	9950000	9470000	8900000	93300	77800	88900
DeB1190	Negative	137	92.8	4.07	138.032	[M-H]-	C00805	Salicylic acid (SA)	Phytohormones	339000	265000	274000	603000	450000	473000
DeB1252	Negative	263	153.2	4.93	264.136	[M-H]-	C06082	(+)-cis,trans-Abscisic acid (ABA)	Phytohormones	477000	450000	480000	236000	244000	244000
DeB1290	Negative	209	58.7	5.64	210.126	[M-H]-	C08491	(+)-Jasmonic acid (JA)	Phytohormones	106000	109000	114000	108000	90900	95400
DeB1312	Negative	322.401	130.1	6.38	323.401	[M-H]-	-	N-[(-)-Jasmonoyl]-(L)-Isoleucine (JA-L-Ile)	Phytohormones	11700	13100	12300	11900	8890	9680
